# Supplementary material for: Unravelling the potential of yolkin for nutraceutical use: the origin, structure, and functional insights of a hen egg yolk polypeptide complex
Source: Royal Society of Chemistry journal article supplement (doi:10.1039/d4fo03023k), 2024-01-01
Supplement: d4fo03023k5.pdf [file d4fo03023k5.pdf]

## 1 Supplementary materials

2

### 3 Table 1A. Lectin specificities and buffer requirements.

| Lectin                            | Preferred specificity      | sugar | Supplier                                   | Binding buffer                                                         |
|-----------------------------------|----------------------------|-------|--------------------------------------------|------------------------------------------------------------------------|
| Concanavalin A (Con A)            | $\alpha$ Man, $\alpha$ Glc |       | Vector Laboratories, Inc., Newark, CA, USA | TBS/0.05% Tween pH 6.3, 1 mM Ca <sup>2+</sup> , 1 mM MnCl <sub>2</sub> |
| Sambucus nigra lectin (SNA)       | Neu5Ac                     |       | Vector Laboratories, Inc., Newark, CA, USA | TBS/0.05% Tween pH 5.5                                                 |
| Ricinus communis lectin I (RCA I) | Gal                        |       | Vector Laboratories, Inc., Newark, CA, USA | TBS/0.05% Tween pH 7.4                                                 |
| Aleuria aurantia lectin (AAL)     | Fuc                        |       | Vector Laboratories, Inc., Newark, CA, USA | TBS/0.05% Tween pH 9.0                                                 |

4

5

6

7

8

9

10

11

12

13

14

15

16

17

18 **Table 2A. Peptides matching the vitellogenin II sequence identified after in-gel tryptic digestion**  
 19 **of yolkin 3 via LC-MS.**

20

| <b>Protein 1:</b>         |               | Vitellogenin-2 OS=Gallus gallus OX=9031 GN=VTG2 PE=1 SV=1 |                       |   |          |       |                  |           |                            |                                   |  |
|---------------------------|---------------|-----------------------------------------------------------|-----------------------|---|----------|-------|------------------|-----------|----------------------------|-----------------------------------|--|
| <b>Accession:</b>         |               | VIT2_CHICK                                                |                       |   |          |       | <b>Score:</b>    |           | 1099,12                    |                                   |  |
| <b>Database:</b>          |               | SwissProt                                                 |                       |   |          |       | <b>MW [kDa]:</b> |           | 204,70                     |                                   |  |
| <b>Seq. Coverage [%]:</b> |               | 9,70 %                                                    |                       |   |          |       | <b>pI:</b>       |           | 9,23                       |                                   |  |
| <b>Modification(s):</b>   |               | Carbamidomethyl, Oxidation                                |                       |   |          |       |                  |           |                            |                                   |  |
|                           |               |                                                           |                       |   |          |       |                  |           |                            |                                   |  |
|                           |               |                                                           |                       |   |          |       |                  |           |                            |                                   |  |
| Cmpd                      | No. of Cmpds. | m/z meas.                                                 | $\Delta$<br>m/z [ppm] | z | Rt [min] | Score | P                | Range     | Sequence                   | Modification                      |  |
| 570                       | 6             | 542.7625                                                  | -2.56                 | 2 | 17.5     | 27.0  | 1                | 1579-1587 | KARCSVSYNKI                | Carbamidomethyl: 3                |  |
| 1314                      | 2             | 429.1936                                                  | -2.55                 | 2 | 21.1     | 36.6  | 0                | 1581-1587 | RCSVSYNKI                  | Carbamidomethyl: 1                |  |
| 2726                      | 20            | 489.7839                                                  | -1.35                 | 2 | 27.3     | 46.0  | 1                | 1588-1595 | KIKTRNEV/KF                |                                   |  |
| 974                       | 17            | 445.7314                                                  | -2.51                 | 2 | 19.5     | 69.5  | 0                | 1624-1632 | K SAGEATNLKA               |                                   |  |
| 4656                      | 2             | 715.4102                                                  | 8.47                  | 2 | 35.4     | 22.4  | 1                | 1624-1637 | K SAGEATNLKAINIKI          |                                   |  |
| 2280                      | 4             | 888.9399                                                  | 1.54                  | 2 | 25.3     | 63.4  | 0                | 1638-1653 | KIGSHEDMHPVNGQVK L         | Oxidation: 8                      |  |
| 3858                      | 2             | 587.6317                                                  | 3.16                  | 3 | 32.0     | 32.6  | 0                | 1638-1653 | KIGSHEDMHPVNGQVK L         |                                   |  |
| 18232                     | 11            | 737.4139                                                  | 4.80                  | 2 | 101.3    | 46.6  | 0                | 1702-1714 | KTTTIQVPLWMAGKT            | Oxidation: 10                     |  |
| 11932                     | 21            | 729.4167                                                  | 5.22                  | 2 | 66.7     | 54.8  | 0                | 1702-1714 | KTTTIQVPLWMAGKT            |                                   |  |
| 5326                      | 13            | 1069.9330                                                 | 0.51                  | 2 | 38.2     | 95.1  | 1                | 1715-1731 | KTCGICGKY DAECEQEY R.M     | Carbamidomethyl: 2, 5, 12         |  |
| 4663                      | 26            | 681.7656                                                  | -2.07                 | 2 | 35.4     | 89.0  | 0                | 1722-1731 | KY DAECEQEY R.M            | Carbamidomethyl: 5                |  |
| 5688                      | 1             | 1126.9827                                                 | -0.28                 | 2 | 39.7     | 55.9  | 1                | 1722-1739 | KY DAECEQEY RMPNGYLAK.N    | Carbamidomethyl: 5; Oxidation: 11 |  |
| 9173                      | 45            | 986.9796                                                  | 9.33                  | 2 | 54.3     | 104.4 | 0                | 1740-1756 | KNAVSEFGHSWLEAFQR.G        | Carbamidomethyl: 16               |  |
| 2872                      | 30            | 425.7543                                                  | -2.22                 | 2 | 27.9     | 40.8  | 1                | 1764-1770 | R.SFVKLEKT                 |                                   |  |
| 5232                      | 30            | 509.2815                                                  | -1.70                 | 2 | 37.8     | 71.1  | 0                | 1771-1780 | KTVQLAGVDSK.C              |                                   |  |
| 5892                      | 33            | 562.7729                                                  | -1.75                 | 2 | 40.6     | 53.6  | 0                | 1781-1789 | KCY STEPVLR.C              | Carbamidomethyl: 1                |  |
| 7642                      | 9             | 1166.0686                                                 | 0.60                  | 2 | 47.8     | 80.7  | 0                | 1799-1820 | K TTPVTVGRHCLPADSANSITDK   | Carbamidomethyl: 10               |  |
| 5                         | 2             | 478.7288                                                  | -0.24                 | 2 | 12.6     | 25.3  | 1                | 1821-1827 | KQMKY DQK.S                | Oxidation: 2                      |  |
| 4336                      | 3             | 1080.7345                                                 | -2.80                 | 3 | 34.1     | 22.5  | 1                | 1824-1850 | KY DQKSEDMQDITVDAHTTCSCENE | Carbamidomethyl: 18, 20, 25       |  |

21

22

23

24

25

26 **Table 3A. Peptides matching the vitellogenin I sequence identified after in-gel tryptic digestion of**  
 27 **yolkin 3 via LC-MS.**

| <b>Protein 2:</b>         |               | Vitellogenin-1 OS=Gallus gallus OX=9031 GN=VTG1 PE=1 SV=1 |                       |   |          |                         |   |           |                           |                                     |
|---------------------------|---------------|-----------------------------------------------------------|-----------------------|---|----------|-------------------------|---|-----------|---------------------------|-------------------------------------|
| <b>Accession:</b>         |               | VIT1_CHICK                                                |                       |   |          | <b>Score:</b>           |   | 795,61    |                           |                                     |
| <b>Database:</b>          |               | SwissProt                                                 |                       |   |          | <b>MW [kDa]:</b>        |   | 210,50    |                           |                                     |
| <b>Seq. Coverage [%]:</b> |               | 6,60 %                                                    |                       |   |          | <b>pI:</b>              |   | 9,16      |                           |                                     |
|                           |               |                                                           |                       |   |          | <b>No. of Peptides:</b> |   | 12        |                           |                                     |
| <b>Modification(s):</b>   |               | Carbamidomethyl, Oxidation                                |                       |   |          |                         |   |           |                           |                                     |
|                           |               |                                                           |                       |   |          |                         |   |           |                           |                                     |
|                           |               |                                                           |                       |   |          |                         |   |           |                           |                                     |
| Cmpd.                     | No. of Cmpds. | m/z meas.                                                 | $\Delta$<br>m/z [ppm] | z | Rt [min] | Score                   | P | Range     | Sequence                  | Modification                        |
| 3023                      | 11            | 872.3934                                                  | 0.34                  | 2 | 28.5     | 72.7                    | 0 | 1664-1678 | K.SCNVVVAQDCTEHPKF        | Carbamidomethyl: 2, 10              |
| 378                       | 1             | 535.2901                                                  | -1.83                 | 2 | 16.4     | 36.2                    | 1 | 1685-1693 | R.KVDHQSLRSRE             |                                     |
| 6233                      | 13            | 638.8881                                                  | 5.18                  | 2 | 42.0     | 55.6                    | 0 | 1745-1756 | K.TVIVEARIHGLKN           |                                     |
| 71                        | 7             | 532.2399                                                  | -0.63                 | 3 | 13.8     | 61.2                    | 2 | 1775-1788 | R.GKTCGVCGNNDREKH         | Carbamidomethyl: 4, 7               |
| 663                       | 6             | 576.7286                                                  | -1.79                 | 2 | 17.9     | 52.1                    | 0 | 1777-1786 | K.TCGVCGNNDRE.E           | Carbamidomethyl: 2, 5               |
| 391                       | 6             | 705.2992                                                  | 1.06                  | 2 | 16.5     | 67.5                    | 1 | 1777-1788 | K.TCGVCGNNDREKH           | Carbamidomethyl: 2, 5               |
| 1039                      | 3             | 624.8104                                                  | -1.53                 | 2 | 19.8     | 54.9                    | 0 | 1789-1798 | K.HNELMPNHL               | Oxidation: 6                        |
| 7141                      | 17            | 836.4064                                                  | -1.39                 | 3 | 45.7     | 71.3                    | 1 | 1830-1851 | K.LNRNPTDGEESTCYSDVPLK    | Carbamidomethyl: 14                 |
| 691                       | 6             | 649.2816                                                  | -1.96                 | 2 | 18.1     | 67.0                    | 1 | 1852-1861 | R.QMKDCTPEKT              | Carbamidomethyl: 1, 5; Oxidation: 2 |
| 2023                      | 16            | 431.7018                                                  | -1.40                 | 2 | 24.2     | 34.2                    | 0 | 1855-1861 | K.DCTPEKT                 | Carbamidomethyl: 2                  |
| 9682                      | 13            | 637.3512                                                  | 4.08                  | 2 | 56.4     | 83.6                    | 0 | 1874-1884 | K.ATAVSLEWQRS             |                                     |
| 11517                     | 5             | 1246.4731                                                 | 0.34                  | 2 | 64.7     | 32.0                    | 0 | 1890-1912 | K.SASEDMVESVDAIDICTCTGDCS | Carbamidomethyl: 16, 18, 22         |

28

29

30

31

32

33

34

35

36

37

38

39

40 **Table 4A. Summary table with parameters characterizing yolkin thermal stability.**

41 The 330/350 nm ratio is represented as IPs corresponding to the T<sub>m</sub> values and an onset of unfolding as  
 42 ON. Aggregation is shown as the IP corresponding to the inflection point of the scattering. In addition,  
 43 the slope of aggregation, temperature onset of aggregation, and average aggregation values are recorded  
 44 and presented in the table.

|          |   | Annotations | Ratio $\lambda$ |          |               |          |               |          | Scattering $\lambda$ |          |                |          |               |          |                   |          |
|----------|---|-------------|-----------------|----------|---------------|----------|---------------|----------|----------------------|----------|----------------|----------|---------------|----------|-------------------|----------|
|          |   |             | IP #1           |          | IP #2         |          | ON            |          | IP #1                |          | Slope at IP #1 |          | ON            |          | ScatteringAverage |          |
| Exclude  | ^ | Sample ID   | $\varnothing$   | $\sigma$ | $\varnothing$ | $\sigma$ | $\varnothing$ | $\sigma$ | $\varnothing$        | $\sigma$ | $\varnothing$  | $\sigma$ | $\varnothing$ | $\sigma$ | $\varnothing$     | $\sigma$ |
| Excluded |   | yolkin 12   | 47,64           | 0,10     | 73,29         | 0,09     | 20,00         | 0,00     | N/A                  | N/A      | N/A            | N/A      | N/A           | N/A      | 5,1               | 1,8      |
| Excluded |   | yolkin 13   | 46,76           | 0,89     | 73,43         | 0,16     | 20,00         | 0,00     | N/A                  | N/A      | N/A            | N/A      | N/A           | N/A      | 1,5               | 7,5      |
| Excluded |   | yolkin 14   | 47,47           | 0,16     | 72,46         | 0,06     | 20,00         | 0,00     | 75,69                | 2,79     | 3,87           | 1,22     | 69,36         | 2,63     | 35,9              | 4,7      |
| Excluded |   | yolkin 15   | 48,34           | 0,62     | 72,57         | 0,03     | 20,00         | 0,00     | 75,58                | 0,16     | 4,33           | 0,59     | 72,40         | 0,43     | 23,5              | 6,8      |
| Excluded |   | lgY         | 48,35           | 0,11     | 72,35         | 0,08     | 40,80         | 0,15     | 74,22                | 0,00     | 5,74           | 0,45     | 59,69         | 0,18     | 46,9              | 0,7      |
| Excluded |   | yolkin 3    | N/A             | N/A      | 71,17         | 0,10     | 57,71         | 0,49     | 79,43                | 0,20     | 3,39           | 0,18     | 76,45         | 0,00     | 17,3              | 1,6      |

45

46
