# Supplementary material for: Unravelling the potential of yolkin for nutraceutical use: the origin, structure, and functional insights of a hen egg yolk polypeptide complex
Source: Royal Society of Chemistry journal article supplement (doi:10.1039/d4fo03023k), 2024-01-01
Supplement: d4fo03023k6.pdf [file d4fo03023k6.pdf]

| Lectin                            | Preferred specificity      | sugar | Supplier                                   | Binding buffer                                                          |
|-----------------------------------|----------------------------|-------|--------------------------------------------|-------------------------------------------------------------------------|
| Concanavalin A (Con A)            | $\alpha$ Man, $\alpha$ Glc |       | Vector Laboratories, Inc., Newark, CA, USA | TBS/0.05% Tween 20, pH 6.3, 1 mM $\text{CaCl}_2$ , 1 mM $\text{MnCl}_2$ |
| Sambucus nigra lectin (SNA)       | Neu5Ac                     |       | Vector Laboratories, Inc., Newark, CA, USA | TBS/0.05% Tween 20, pH 5.5                                              |
| Ricinus communis lectin I (RCA I) | Gal                        |       | Vector Laboratories, Inc., Newark, CA, USA | TBS/0.05% Tween 20, pH 7.4                                              |
| Aleuria aurantia lectin (AAL)     | Fuc                        |       | Vector Laboratories, Inc., Newark, CA, USA | TBS/0.05% Tween 20, pH 9.0                                              |
