# Supplementary material for: Unravelling the potential of yolkin for nutraceutical use: the origin, structure, and functional insights of a hen egg yolk polypeptide complex
Source: Royal Society of Chemistry journal article supplement (doi:10.1039/d4fo03023k), 2024-01-01
Supplement: d4fo03023k7.pdf [file d4fo03023k7.pdf]

|                           |                                                           |                         |         |
|---------------------------|-----------------------------------------------------------|-------------------------|---------|
| <b>Protein 1:</b>         | Vitellogenin-2 OS=Gallus gallus OX=9031 GN=VTG2 PE=1 SV=1 |                         |         |
| <b>Accession:</b>         | VIT2_CHICK                                                | <b>Score:</b>           | 1099,12 |
| <b>Database:</b>          | SwissProt                                                 | <b>MW [kDa]:</b>        | 204,70  |
| <b>Seq. Coverage [%]:</b> | 9,70 %                                                    | <b>pI:</b>              | 9,23    |
|                           |                                                           | <b>No. of Peptides:</b> | 19      |
| <b>Modification(s):</b>   | Carbamidomethyl, Oxidation                                |                         |         |

| Cmpd. | No. of Cmpds. | m/z meas. | $\Delta$  | z | Rt [min] | Score | P | Range     | Sequence                    | Modification                      |
|-------|---------------|-----------|-----------|---|----------|-------|---|-----------|-----------------------------|-----------------------------------|
|       |               |           | m/z [ppm] |   |          |       |   |           |                             |                                   |
| 570   | 6             | 542.7625  | -2.56     | 2 | 17.5     | 27.0  | 1 | 1579-1587 | KARCSVSYNKI                 | Carbamidomethyl: 3                |
| 1314  | 2             | 429.1936  | -2.55     | 2 | 21.1     | 36.6  | 0 | 1581-1587 | RCSVSYNKI                   | Carbamidomethyl: 1                |
| 2726  | 20            | 489.7839  | -1.35     | 2 | 27.3     | 46.0  | 1 | 1588-1595 | KIKTRNEVKF                  |                                   |
| 974   | 17            | 445.7314  | -2.51     | 2 | 19.5     | 69.5  | 0 | 1624-1632 | K.SAGEATNLK.A               |                                   |
| 4656  | 2             | 715.4102  | 8.47      | 2 | 35.4     | 22.4  | 1 | 1624-1637 | K.SAGEATNLKAINIKI           |                                   |
| 2280  | 4             | 888.9399  | 1.54      | 2 | 25.3     | 63.4  | 0 | 1638-1653 | KIGSHEDMHPVNGQVK.L          | Oxidation: 8                      |
| 3858  | 2             | 587.6317  | 3.16      | 3 | 32.0     | 32.6  | 0 | 1638-1653 | KIGSHEDMHPVNGQVK.L          |                                   |
| 18232 | 11            | 737.4139  | 4.80      | 2 | 101.3    | 46.6  | 0 | 1702-1714 | K.TITIQVPLWMAGK.T           | Oxidation: 10                     |
| 11932 | 21            | 729.4167  | 5.22      | 2 | 66.7     | 54.8  | 0 | 1702-1714 | K.TITIQVPLWMAGK.T           |                                   |
| 5326  | 13            | 1069.9330 | 0.51      | 2 | 38.2     | 95.1  | 1 | 1715-1731 | K.TCGICGKY.DAECEQEY.R.M     | Carbamidomethyl: 2, 5, 12         |
| 4663  | 26            | 681.7656  | -2.07     | 2 | 35.4     | 89.0  | 0 | 1722-1731 | K.Y.DAECEQEY.R.M            | Carbamidomethyl: 5                |
| 5688  | 1             | 1126.9827 | -0.28     | 2 | 39.7     | 55.9  | 1 | 1722-1739 | K.Y.DAECEQEY.R.M.PNGY.LAK.N | Carbamidomethyl: 5; Oxidation: 11 |
| 9173  | 45            | 986.9796  | 9.33      | 2 | 54.3     | 104.4 | 0 | 1740-1756 | K.NAVSFGHSHWILEEAPCR.G      | Carbamidomethyl: 16               |
| 2872  | 30            | 425.7543  | -2.22     | 2 | 27.9     | 40.8  | 1 | 1764-1770 | R.SFKLEK.T                  |                                   |
| 5232  | 30            | 509.2815  | -1.70     | 2 | 37.8     | 71.1  | 0 | 1771-1780 | K.TVQLAGVDSK.C              |                                   |
| 5892  | 33            | 562.7729  | -1.75     | 2 | 40.6     | 53.6  | 0 | 1781-1789 | K.CY.STEPLR.C               | Carbamidomethyl: 1                |
| 7642  | 9             | 1166.0686 | 0.60      | 2 | 47.8     | 80.7  | 0 | 1799-1820 | K.TTPVTVGFHCL.PADSANSLTDK   | Carbamidomethyl: 10               |
| 5     | 2             | 478.7288  | -0.24     | 2 | 12.6     | 25.3  | 1 | 1821-1827 | K.QMKY.DQK.S                | Oxidation: 2                      |
| 4336  | 3             | 1080.7345 | -2.80     | 3 | 34.1     | 22.5  | 1 | 1824-1850 | K.Y.DQKSEDMQDTV.DAHTTCSCENE | Carbamidomethyl: 18, 20, 25       |
