# Supplementary material for: Unravelling the potential of yolkin for nutraceutical use: the origin, structure, and functional insights of a hen egg yolk polypeptide complex
Source: Royal Society of Chemistry journal article supplement (doi:10.1039/d4fo03023k), 2024-01-01
Supplement: d4fo03023k8.pdf [file d4fo03023k8.pdf]

| <b>Protein 2:</b>         |               | Vitellogenin-1 OS=Gallus gallus OX=9031 GN=VTG1 PE=1 SV=1 |                       |   |                         |       |   |           |                            |                                     |
|---------------------------|---------------|-----------------------------------------------------------|-----------------------|---|-------------------------|-------|---|-----------|----------------------------|-------------------------------------|
| <b>Accession:</b>         |               | VIT1_CHICK                                                |                       |   | <b>Score:</b>           |       |   | 795,61    |                            |                                     |
| <b>Database:</b>          |               | SwissProt                                                 |                       |   | <b>MW [kDa]:</b>        |       |   | 210,50    |                            |                                     |
| <b>Seq. Coverage [%]:</b> |               | 6,60 %                                                    |                       |   | <b>pl:</b>              |       |   | 9,16      |                            |                                     |
|                           |               |                                                           |                       |   | <b>No. of Peptides:</b> |       |   | 12        |                            |                                     |
| <b>Modification(s):</b>   |               | Carbamidomethyl, Oxidation                                |                       |   |                         |       |   |           |                            |                                     |
|                           |               |                                                           |                       |   |                         |       |   |           |                            |                                     |
|                           |               |                                                           |                       |   |                         |       |   |           |                            |                                     |
|                           |               |                                                           |                       |   |                         |       |   |           |                            |                                     |
| Cmpd.                     | No. of Cmpds. | m/z meas.                                                 | $\Delta$<br>m/z [ppm] | z | Rt [min]                | Score | P | Range     | Sequence                   | Modification                        |
| 3023                      | 11            | 872.3934                                                  | 0.34                  | 2 | 28.5                    | 72.7  | 0 | 1664-1678 | K.SCNVVVAQDCTEHPK.F        | Carbamidomethyl: 2, 10              |
| 378                       | 1             | 535.2901                                                  | -1.83                 | 2 | 16.4                    | 36.2  | 1 | 1685-1693 | R.KVDHQSLSR.E              |                                     |
| 6233                      | 13            | 638.8881                                                  | 5.18                  | 2 | 42.0                    | 55.6  | 0 | 1745-1756 | K.TVIVEAPIHGLK.N           |                                     |
| 71                        | 7             | 532.2399                                                  | -0.63                 | 3 | 13.8                    | 61.2  | 2 | 1775-1788 | R.GKTCGVCGNNDREK.H         | Carbamidomethyl: 4, 7               |
| 663                       | 6             | 576.7286                                                  | -1.79                 | 2 | 17.9                    | 52.1  | 0 | 1777-1786 | K.TCGVCGNNDRE.E            | Carbamidomethyl: 2, 5               |
| 391                       | 6             | 705.2992                                                  | 1.06                  | 2 | 16.5                    | 67.5  | 1 | 1777-1788 | K.TCGVCGNNDREK.H           | Carbamidomethyl: 2, 5               |
| 1039                      | 3             | 624.8104                                                  | -1.53                 | 2 | 19.8                    | 54.9  | 0 | 1789-1798 | K.HNELLMPNHK.L             | Oxidation: 6                        |
| 7141                      | 17            | 836.4064                                                  | -1.39                 | 3 | 45.7                    | 71.3  | 1 | 1830-1851 | K.LNRNPTIDGEEESTCYSDVP/LK. | Carbamidomethyl: 14                 |
| 691                       | 6             | 649.2816                                                  | -1.96                 | 2 | 18.1                    | 67.0  | 1 | 1852-1861 | K.CMKDCTPIEK.T             | Carbamidomethyl: 1, 5; Oxidation: 2 |
| 2023                      | 16            | 431.7018                                                  | -1.40                 | 2 | 24.2                    | 34.2  | 0 | 1855-1861 | K.DCTPIEK.T                | Carbamidomethyl: 2                  |
| 9682                      | 13            | 637.3512                                                  | 4.08                  | 2 | 56.4                    | 83.6  | 0 | 1874-1884 | K.ATAVSLLEWQR.S            |                                     |
| 11517                     | 5             | 1246.4731                                                 | 0.34                  | 2 | 64.7                    | 32.0  | 0 | 1890-1912 | K.SASEDVVESVDAIDCTCTGDCS   | Carbamidomethyl: 16, 18, 22         |
