# Supplementary material for: Unravelling the potential of yolkin for nutraceutical use: the origin, structure, and functional insights of a hen egg yolk polypeptide complex
Source: Royal Society of Chemistry journal article supplement (doi:10.1039/d4fo03023k), 2024-01-01
Supplement: d4fo03023k9.pdf [file d4fo03023k9.pdf]

|          |   | Annotations | Ratio <sup>↗</sup> |       |       |      |       |       | Scattering <sup>↗</sup> |                |      |      |       |                   |      |     |
|----------|---|-------------|--------------------|-------|-------|------|-------|-------|-------------------------|----------------|------|------|-------|-------------------|------|-----|
|          |   | IP #1       |                    | IP #2 |       | ON   |       | IP #1 |                         | Slope at IP #1 |      | ON   |       | ScatteringAverage |      |     |
| Exclude  | Δ | Sample ID   | σ                  | σ     | σ     | σ    | σ     | σ     | σ                       | σ              | σ    | σ    | σ     | σ                 | σ    |     |
| Excluded |   | yolkin 12   | 47,64              | 0,10  | 73,29 | 0,09 | 20,00 | 0,00  | N/A                     | N/A            | N/A  | N/A  | N/A   | N/A               | 5,1  | 1,8 |
| Excluded |   | yolkin 13   | 46,76              | 0,89  | 73,43 | 0,16 | 20,00 | 0,00  | N/A                     | N/A            | N/A  | N/A  | N/A   | N/A               | 1,5  | 7,5 |
| Excluded |   | yolkin 14   | 47,47              | 0,16  | 72,46 | 0,06 | 20,00 | 0,00  | 75,69                   | 2,79           | 3,87 | 1,22 | 69,36 | 2,63              | 35,9 | 4,7 |
| Excluded |   | yolkin 15   | 48,34              | 0,62  | 72,57 | 0,03 | 20,00 | 0,00  | 75,58                   | 0,16           | 4,33 | 0,59 | 72,40 | 0,43              | 23,5 | 6,8 |
| Excluded |   | IgY         | 48,35              | 0,11  | 72,35 | 0,08 | 40,80 | 0,15  | 74,22                   | 0,00           | 5,74 | 0,45 | 59,69 | 0,18              | 46,9 | 0,7 |
| Excluded |   | yolkin 3    | N/A                | N/A   | 71,17 | 0,10 | 57,71 | 0,49  | 79,43                   | 0,20           | 3,39 | 0,18 | 76,45 | 0,00              | 17,3 | 1,6 |
