# Supplementary figures and images for: Unravelling the potential of yolkin for nutraceutical use: the origin, structure, and functional insights of a hen egg yolk polypeptide complex
Source: Royal Society of Chemistry journal article supplement (doi:10.1039/d4fo03023k), 2024-01-01

### Supplementary information FigS1a

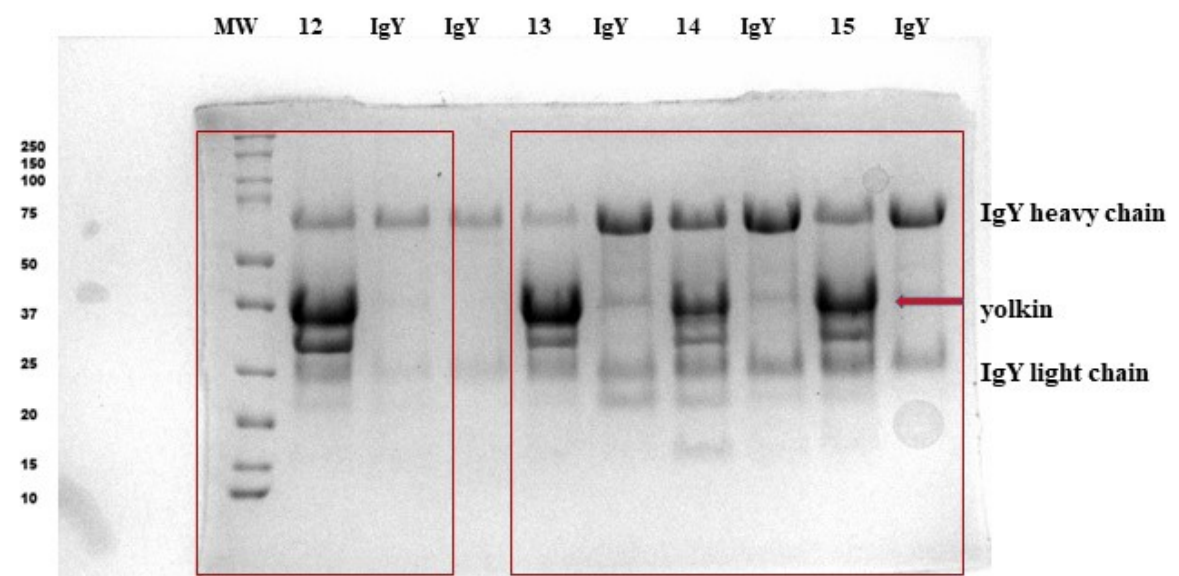

Supplement: d4fo03023k1.pdf [file d4fo03023k1.pdf]

### Supplementary Information FigS1b

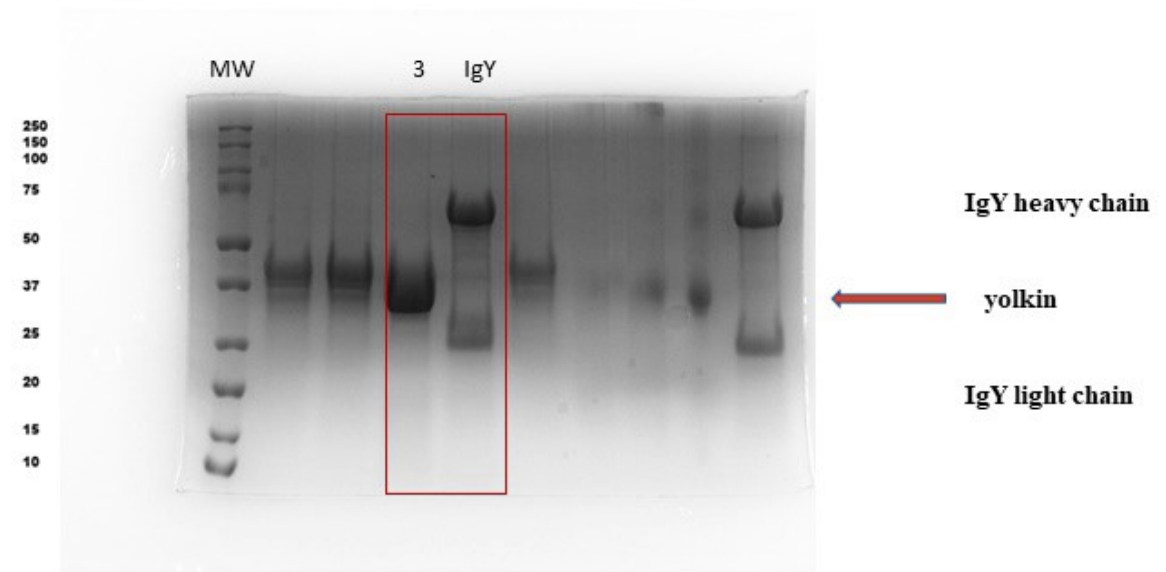

b

Supplement: d4fo03023k2.pdf [file d4fo03023k2.pdf]

Supplementary Information Fig S6a

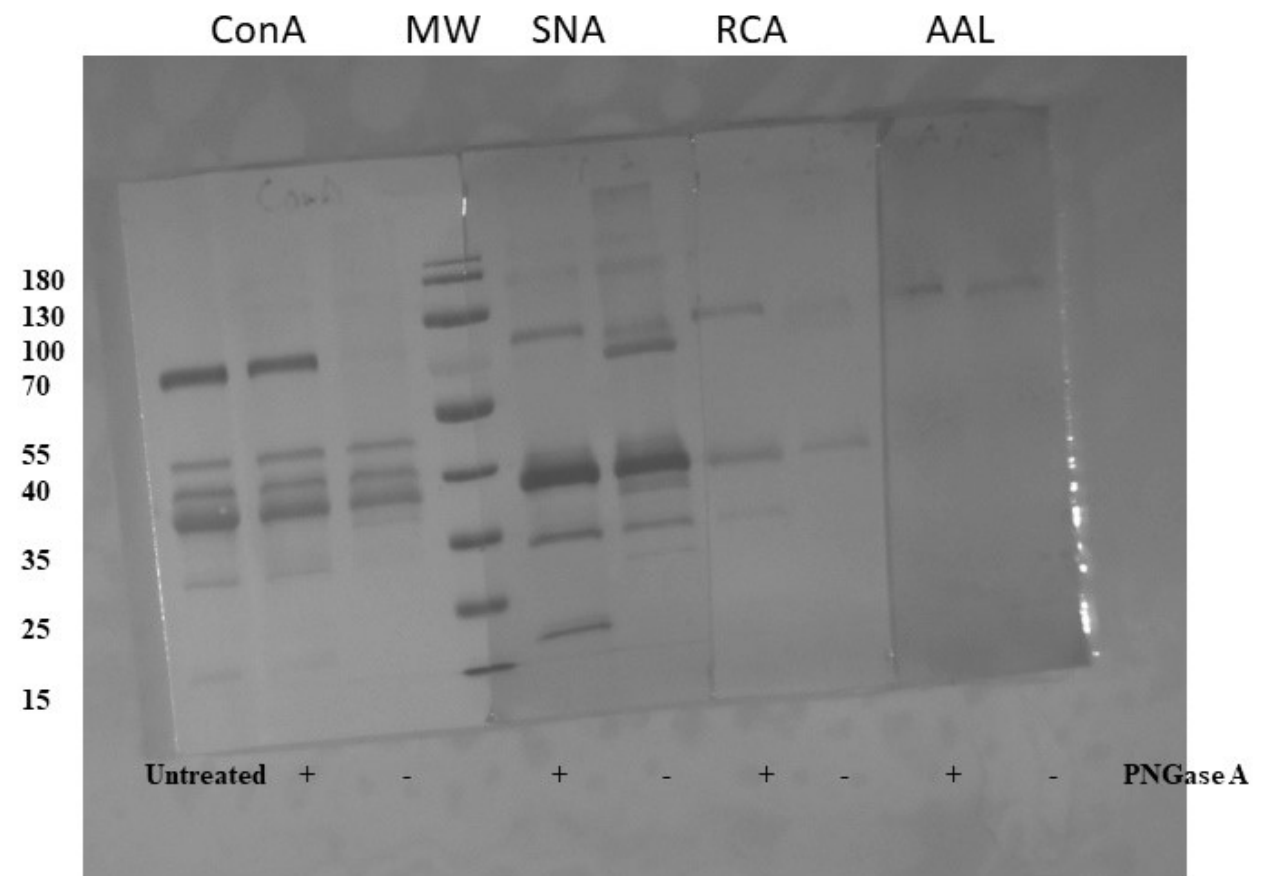

Supplement: d4fo03023k4.pdf [file d4fo03023k4.pdf]
